# Supplementary material for: Predictive factors for survival in borderline resectable and locally advanced pancreatic cancer: are these really two different entities?
Source: Springer Nature journal article supplement (doi:10.1186/s12893-023-02200-6), 2023-09-30
Supplement: MOESM1 [file 26109502]

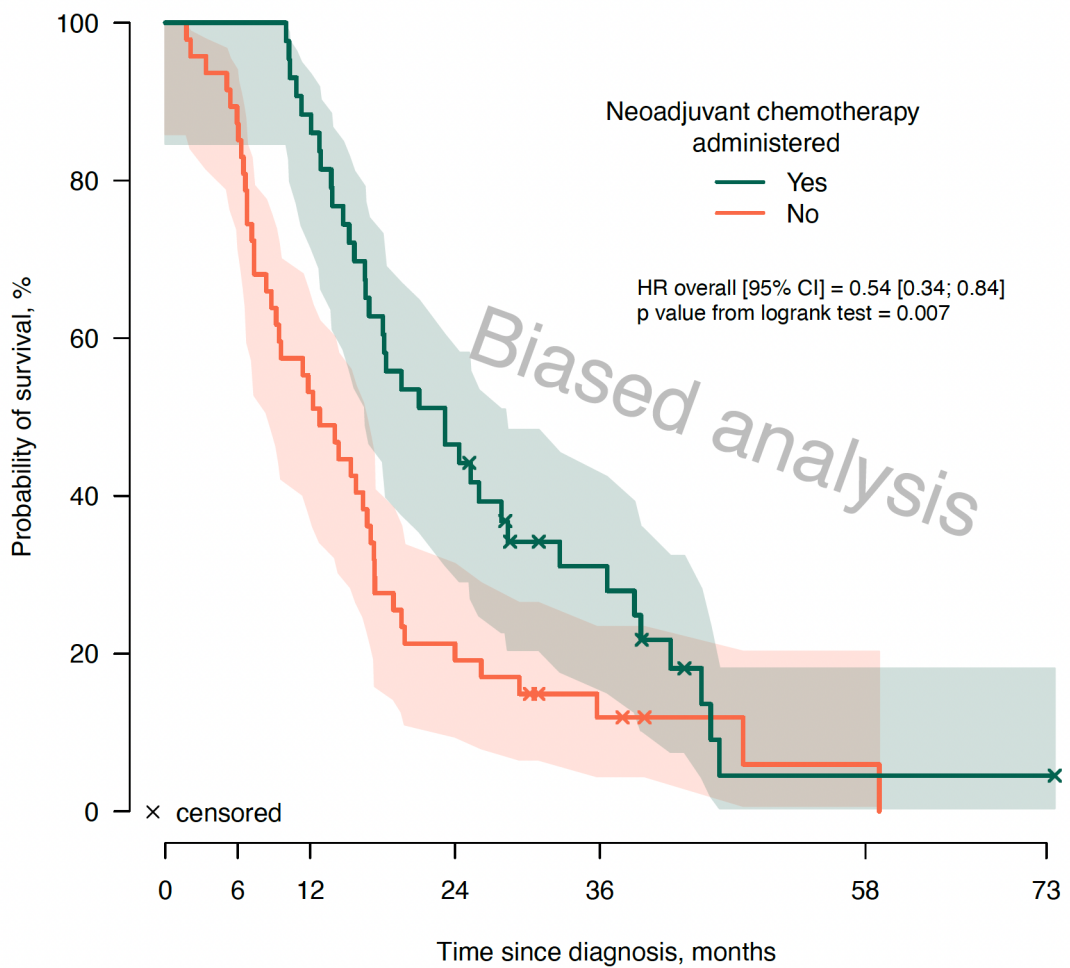

**Number at risk (censored)**

|     | 0      | 6      | 12     | 24     | 36     | 58    | 73    |
|-----|--------|--------|--------|--------|--------|-------|-------|
| Yes | 43 (0) | 43 (0) | 39 (0) | 22 (0) | 11 (4) | 2 (6) | 2 (6) |
| No  | 47 (0) | 42 (0) | 26 (0) | 10 (0) | 5 (2)  | 2 (4) | 1 (4) |

Additional file 1

Overall survival according to the administration of neoadjuvant chemotherapy calculated from the time of diagnosis instead of from the time of surgery.
